# Supplementary material for: Fine Mapping of the Leaf Rust Resistance Gene Lr65 in Spelt Wheat ‘Altgold’
Source: Frontiers journal article supplement (doi:10.3389/fpls.2021.666921), 2021-06-28
Supplement: Data_Sheet_1.PDF [file Data_Sheet_1.PDF]

# Fine mapping of the leaf rust resistance gene *Lr65* in spelt wheat ‘Altgold’

Qiang Zhang<sup>1</sup>, Wenxin Wei<sup>1</sup>, Xiangxi Zuansun<sup>1</sup>, Shengnan Zhang<sup>1</sup>, Chen Wang<sup>1</sup>, Nannan Liu<sup>1</sup>, Lina Qiu<sup>1</sup>,  
Weidong Wang<sup>1</sup>, Weilong Guo<sup>1</sup>, Jun Ma<sup>1</sup>, Huiru Peng<sup>1</sup>, Zhaorong Hu<sup>1</sup>, Qixin Sun<sup>1</sup>, Chaojie Xie<sup>1\*</sup>

<sup>1</sup>State Key Laboratory for Agrobiotechnology, Key Laboratory of Crop Heterosis and Utilization (MOE), Key Laboratory of Crop Genetic Improvement, College of Agronomy and Biotechnology, China Agricultural University, Beijing, China.

\* Corresponding author:

xiecj127@126.com (86-010-62731064)

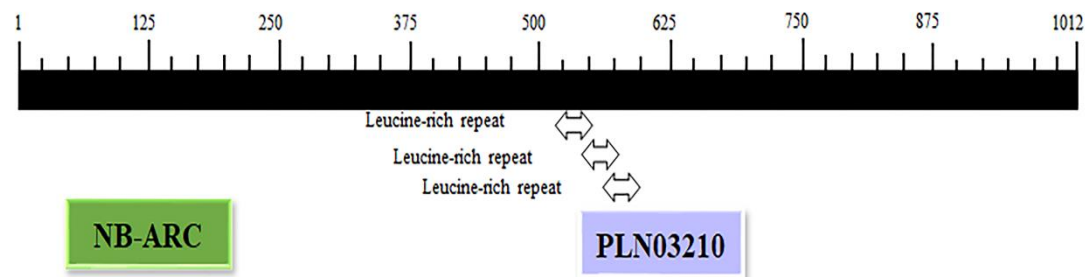

Fig. S1 Structural prediction of amino acids encoded by *TraesCS2A02G001500* gene. NB-ARC is a loci capable of binding to nucleotides. PLN03210 is a multiple leucine-rich repeat sequence.

```

1  ATGAGCAATCTGACACAGGCAATCTATTGATGATGAGGATGAGGCTGCTGCTCT  GGGGTGCTTAGAGCCTAGCTGAGAGCCTCCGCAATTTGCTGAAGAAATGAGAG  ATCATCCAGCTGATGCTCCAGGTGGAAAAAGAGAGCACTCCAGAGGCAATGCA
1  ATGAGCAATCTGACACAGGCAATCTATTGATGATGAGGATGAGGCTGCTGCTCT  GGGGTGCTTAGAGCCTAGCTGAGAGCCTCCGCAATTTGCTGAAGAAATGAGAG  ATCATCCAGCTGATGCTCCAGGTGGAAAAAGAGAGCACTCCAGAGGCAATGCA
181  AAGAGCAATCTGACACAGGCAATCTATTGATGATGAGGATGAGGAGAT  GATTCAGAGAGATGATGAGGCTCAAGGCTCAAGATAGATGATGCTGGAGAGAGATC  TTCCGGGTCTTATGGGCAATAGATGTTTATGGGTCTTCAATATGAGGCAATGATG
181  AAGAGCAATCTGACACAGGCAATCTATTGATGATGAGGATGAGGAGAT  GATTCAGAGAGATGATGAGGCTCAAGGCTCAAGATAGATGATGCTGGAGAGAGATC  TTCCGGGTCTTATGGGCAATAGATGTTTATGGGTCTTCAATATGAGGCAATGATG
361  GTTAATTTAGGAGGTTGGGCTCCAGAGGAAATTTTGAACCAAGATATGAG  ACATTTGAGGAGGCTTGGCTCAACCCAGCAATAGTGAAGAGTGGATGCTCACAT  CTTTCTTTAGAGCACTGATGATGGGTCAAGGTTGGATTTATGCTGCAAAATGAGCT
361  GTTAATTTAGGAGGTTGGGCTCCAGAGGAAATTTTGAACCAAGATATGAG  ACATTTGAGGAGGCTTGGCTCAACCCAGCAATAGTGAAGAGTGGATGCTCACAT  CTTTCTTTAGAGCACTGATGATGGGTCAAGGTTGGATTTATGCTGCAAAATGAGCT
541  AAGAGAAATCTGAGGCAATATAAGCTCTTCAAGAGATCTGAAGATGTTGCTGTAT  CTGCTGATTAATCTTCAAGAGAGTATGATGATGATGATGATGATGATGATGATGAT  TGAGCTATTGGGATGATGATGATGATGATGATGATGATGATGATGATGATGATGATG
541  AAGAGAAATCTGAGGCAATATAAGCTCTTCAAGAGATCTGAAGAGTGGTGTGTAT  CTGCTGATTAATCTTCAAGAGAGTATGATGATGATGATGATGATGATGATGATGATGAT  TGAGCTATTGGGATGATGATGATGATGATGATGATGATGATGATGATGATGATGATG
721  ATTGGGCTGCTGCTGATGATGATGATGATGATGATGATGATGATGATGATGAT  TCTTTTGGTCATTAATGAGAGCTCTTGAAGAGGAGATGATGATGATGATGATGATGAT  GTTGTGCTCAAAATCACTGCTCTTTTATGCTGATGATGATGATGATGATGATGATGATG
721  ATTGGGCTGCTGCTGATGATGATGATGATGATGATGATGATGATGATGATGAT  TCTTTTGGTCATTAATGAGAGCTCTTGAAGAGGAGATGATGATGATGATGATGATGAT  GTTGTGCTCAAAATCACTGCTCTTTTATGCTGATGATGATGATGATGATGATGATGATG
901  CATTAGAGGCTCTGATGATGATGATGATGATGATGATGATGATGATGATGAT  TTAGGCTGATGATGATGATGATGATGATGATGATGATGATGATGATGATGATGATGAT  TTCTGCTGATGATGATGATGATGATGATGATGATGATGATGATGATGATGATGATGATG
1981  CACCAATGAAATTTTTCAGGCTATGAGGCTGATGATGATGATGATGATGATGAT  TTGGATTTGTCAGACACATGATGAGAGCTATGCTGATGATGATGATGATGATGATGAT  AAGAAAGAGGATTTGGTCCGCGGTTTCCATGAGAGAAATGAGAGAAATCTGATAG
1981  CACCAATGAAATTTTTCAGGCTATGAGGCTGATGATGATGATGATGATGATGAT  TTGGATTTGTCAGACACATGATGAGAGCTATGCTGATGATGATGATGATGATGATGAT  AAGAAAGAGGATTTGGTCCGCGGTTTCCATGAGAGAAATGAGAGAAATCTGATAG
1261  CTGAGTATGATGATGATGATGATGATGATGATGATGATGATGATGATGATGAT  ATGCTGATGATGATGATGATGATGATGATGATGATGATGATGATGATGATGATGAT  CTCTCAAAAGAGGATGATGATGATGATGATGATGATGATGATGATGATGATGATGATG
1261  CTGAGTATGATGATGATGATGATGATGATGATGATGATGATGATGATGATGAT  ATGCTGATGATGATGATGATGATGATGATGATGATGATGATGATGATGATGATGAT  CTCTCAAAAGAGGATGATGATGATGATGATGATGATGATGATGATGATGATGATGATG
1441  GTTGAAGATCTGATGATGATGATGATGATGATGATGATGATGATGATGATGAT  GATTCAGAGAGGAGGAGGAGGAGGAGGAGGAGGAGGAGGAGGAGGAGGAGGAGGAGG  TTCACTGCTGCTGATGATGATGATGATGATGATGATGATGATGATGATGATGATGATG
1441  GTTGAAGATCTGATGATGATGATGATGATGATGATGATGATGATGATGATGAT  GATTCAGAGAGGAGGAGGAGGAGGAGGAGGAGGAGGAGGAGGAGGAGGAGGAGGAGG  TTCACTGCTGCTGATGATGATGATGATGATGATGATGATGATGATGATGATGATGATG
1621  AAGACATCTGATGATGATGATGATGATGATGATGATGATGATGATGATGATGAT  TTGGATGATGATGATGATGATGATGATGATGATGATGATGATGATGATGATGATGAT  GTGCTTCAATGATGATGATGATGATGATGATGATGATGATGATGATGATGATGATGATG
1621  AAGACATCTGATGATGATGATGATGATGATGATGATGATGATGATGATGATGAT  TTGGATGATGATGATGATGATGATGATGATGATGATGATGATGATGATGATGATGAT  GTGCTTCAATGATGATGATGATGATGATGATGATGATGATGATGATGATGATGATGATG
1801  ACTATGATGATGATGATGATGATGATGATGATGATGATGATGATGATGATGAT  TGGAGAGGAGGATGATGATGATGATGATGATGATGATGATGATGATGATGATGATGAT  CAAGCTATGATGATGATGATGATGATGATGATGATGATGATGATGATGATGATGATGAT
1801  ACTATGATGATGATGATGATGATGATGATGATGATGATGATGATGATGATGAT  TGGAGAGGAGGATGATGATGATGATGATGATGATGATGATGATGATGATGATGATGAT  CAAGCTATGATGATGATGATGATGATGATGATGATGATGATGATGATGATGATGATGAT
1981  CACCAATGATGATGATGATGATGATGATGATGATGATGATGATGATGATGATGAT  ATATGATGATGATGATGATGATGATGATGATGATGATGATGATGATGATGATGATGAT  GAGATGATGATGATGATGATGATGATGATGATGATGATGATGATGATGATGATGATGAT
1981  CACCAATGATGATGATGATGATGATGATGATGATGATGATGATGATGATGATGAT  ATATGATGATGATGATGATGATGATGATGATGATGATGATGATGATGATGATGATGAT  GAGATGATGATGATGATGATGATGATGATGATGATGATGATGATGATGATGATGATGAT
2161  ATCTTGGATGATGATGATGATGATGATGATGATGATGATGATGATGATGATGAT  GTGATGATGATGATGATGATGATGATGATGATGATGATGATGATGATGATGATGATGAT  CAGTGGCTGATGATGATGATGATGATGATGATGATGATGATGATGATGATGATGATGAT
2161  ATCTTGGATGATGATGATGATGATGATGATGATGATGATGATGATGATGATGAT  GTGATGATGATGATGATGATGATGATGATGATGATGATGATGATGATGATGATGATGAT  CAGTGGCTGATGATGATGATGATGATGATGATGATGATGATGATGATGATGATGATGAT
2341  ATCTTGGATGATGATGATGATGATGATGATGATGATGATGATGATGATGATGAT  GTGATGATGATGATGATGATGATGATGATGATGATGATGATGATGATGATGATGATGAT  CAGTGGCTGATGATGATGATGATGATGATGATGATGATGATGATGATGATGATGATGAT
2341  ATCTTGGATGATGATGATGATGATGATGATGATGATGATGATGATGATGATGAT  GTGATGATGATGATGATGATGATGATGATGATGATGATGATGATGATGATGATGATGAT  CAGTGGCTGATGATGATGATGATGATGATGATGATGATGATGATGATGATGATGATGAT
2521  CAGTGGCTGATGATGATGATGATGATGATGATGATGATGATGATGATGATGAT  ATTTGGAGGAGGAGGAGGAGGAGGAGGAGGAGGAGGAGGAGGAGGAGGAGGAGGAG  AGCATATCTCTTCTCTCTCTCTCTCTCTCTCTCTCTCTCTCTCTCTCTCTCTCTCTCT
2521  CAGTGGCTGATGATGATGATGATGATGATGATGATGATGATGATGATGATGAT  ATTTGGAGGAGGAGGAGGAGGAGGAGGAGGAGGAGGAGGAGGAGGAGGAGGAGGAG  AGCATATCTCTCTCTCTCTCTCTCTCTCTCTCTCTCTCTCTCTCTCTCTCTCTCTCTCT
2701  CAGGCACTATTTGAGCAATTTAGAGGATTTCCAGATGATGATGATGATGATGAT  ATGATGATGATGATGATGATGATGATGATGATGATGATGATGATGATGATGATGATGAT  CACATATCTCTCTCTCTCTCTCTCTCTCTCTCTCTCTCTCTCTCTCTCTCTCTCTCTCT
2701  CAGGCACTATTTGAGCAATTTAGAGGATTTCCAGATGATGATGATGATGATGAT  ATGATGATGATGATGATGATGATGATGATGATGATGATGATGATGATGATGATGATGAT  CACATATCTCTCTCTCTCTCTCTCTCTCTCTCTCTCTCTCTCTCTCTCTCTCTCTCTCT
2881  CAGGCACTATTTGAGCAATTTAGAGGATTTCCAGATGATGATGATGATGATGAT  ATGATGATGATGATGATGATGATGATGATGATGATGATGATGATGATGATGATGATGAT  CACATATCTCTCTCTCTCTCTCTCTCTCTCTCTCTCTCTCTCTCTCTCTCTCTCTCTCT
2881  CAGGCACTATTTGAGCAATTTAGAGGATTTCCAGATGATGATGATGATGATGAT  ATGATGATGATGATGATGATGATGATGATGATGATGATGATGATGATGATGATGATGAT  CACATATCTCTCTCTCTCTCTCTCTCTCTCTCTCTCTCTCTCTCTCTCTCTCTCTCTCT
2881  AAGATGATGATGATGATGATGATGATGATGATGATGATGATGATGATGATGAT  ATGATGATGATGATGATGATGATGATGATGATGATGATGATGATGATGATGATGATGAT  CACATATCTCTCTCTCTCTCTCTCTCTCTCTCTCTCTCTCTCTCTCTCTCTCTCTCTCT
2881  AAGATGATGATGATGATGATGATGATGATGATGATGATGATGATGATGATGAT  ATGATGATGATGATGATGATGATGATGATGATGATGATGATGATGATGATGATGATGAT  CACATATCTCTCTCTCTCTCTCTCTCTCTCTCTCTCTCTCTCTCTCTCTCTCTCTCTCT

```

Fig. S2 Nucleotide sequence of the annotated gene *TraesCS2A02G001400* compared between resistant (Altgold) and susceptible (CS) parents. Blue and black represent Altgold and CS, resp.

```

1      ATGCCTCGAGAGAGGATTGATGCGGACACCATTGATGAAGCGGTTAGTAATGTAATCCCTTATCTAGAGGATACAAGCAATACTACACACAAGGCCATC
|      ||||||||||||||||||||||||||||||||||||||||||||||||||||||||||||||||||||||||||||||||||||||||||||||||||||||
1      ATGCCTCGAGAGAGGATTGATGCGGACACCATTGATGAAGCGGTTAGTAATGTAATCCCTTATCTAGAGGATACAAGCAATACTACACACAAGGCCATC

100    T      TCATCAATCGGACAAACTTCGGGTGCTCAAGTTATGTCATTGCACCTTCAGTTTTCCTG
|      ||||||||||||||||||||||||||||||||||||||||||||||||||||||||||||||||||||||||||||||||||||||||||||||||||
100    T      TCATCAATCGGACAAACTTCGGGTGCTCAAGTTATGTCATTGCACCTTCAGTTTTCCTG

1061   CACCTCCTTTTGTGTTGTCACAACTTAAGGTTCTTGGATTAGATGGCTGCAAGGACCAGCGAGG...AGAAGAAGATGAGAAGCAAGATAGACCGG
|      ||||||||||||||||||||||||||||||||||||||||||||||||||||||||||||||||||||||||||||||||||||||||||||||||||
1061   CACCTCCTTTTGTGTTGTCACAACTTAAGGTTCTTGGATTAGATGGCTGCAAGGACCAGCGAGGAGAAGAAGATGAGAAGCAAGATAGACCGG

1160   CAATGGAATTTTGTGAGAGCTATGGGTACTAGACATATGCCACACGGATTGGGAGTTGGACTTAGCAACATACATAACAGAGAAGATGGCTGCAAACA
|      ||||||||||||||||||||||||||||||||||||||||||||||||||||||||||||||||||||||||||||||||||||||||||||||||||
1160   CAATGGAATTTTGTGAGAACCTATGGGTACTAGACATATGCCACACGGATTGGGAGTTGGACTTAGCAACATACATAACAGAGAAGATGGCTGCAAACA

1259   TTAGGGAGGTACATATAAAGAAAGGAAGGATTGGTGCCACA-----GTGGGACGGGCGGAGGCCA
|      ||||||||||||||||||||||||||||||||||||||||||||||||||||||||||||||||||||||||||||||||||||||||||||||||||
1259   TTAGGGAGGTACATATAAAGAAAGGAAGGATTGGTGCCACA-----GTGGGACGGGCGGAGGCCA

2960   GCCATGACCCTTCCCTCTATGATCCCGCCACTCATCATA
|      ||||||||||||||||||||||||||||||||||||||||||||||||||||||||||||||||||||||||||||||||||||||||||||||||||
2960   GCCATGACCCTTCCCTCTATGATCCCGCCACTCATCATA

```

FigS3. Nucleotide sequence of the annotated gene *TraesCS2A02G001500* compared between resistant (Altgold) and susceptible (CS) parents. Blue and black represent Altgold and CS, resp. The horizontal line represents the omission of part of the same sequence of both parents. The red box shows a 3-bp indel and a SNP.

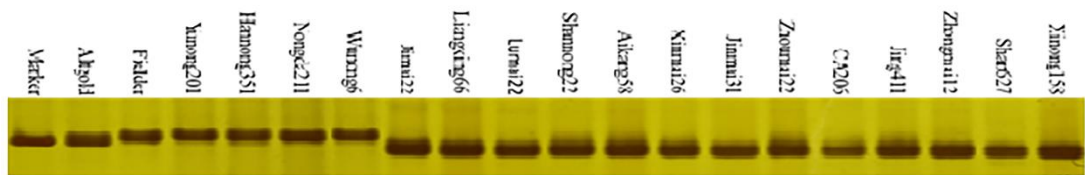

Fig. S4 PCR products of Altgold and 18 Chinese cultivars

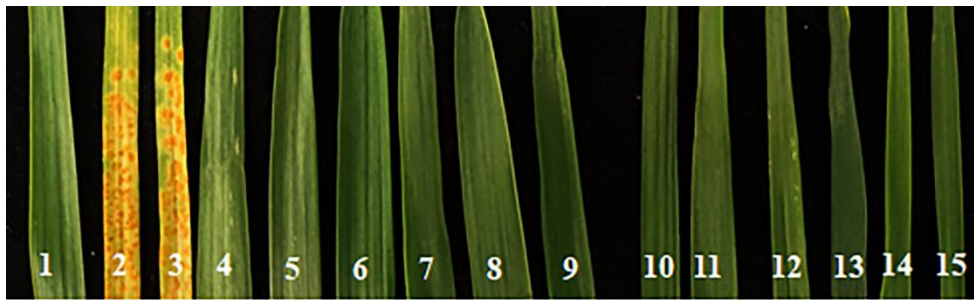

Fig. S5 Images of plants in the greenhouse. 1-3 are Xuexao / Altgold disease resistant progeny, Shiyou20 and Zhongmai1062, respectively; 4-9 are backcross progeny of Xuezaao / Altgold disease resistant progeny and Shiyou20; 10-15 are backcross progeny of Xuezaao / Altgold disease resistant progeny and Zhongmai1062.
